# Supplementary material for: Two luminescent metal–organic frameworks with multifunctional properties for nitroaromatic compounds sensing and photocatalysis
Source: Royal Society of Chemistry journal article supplement (doi:10.1039/c5ra11308c), 2015-01-01
Supplement: c5ra11308c1.pdf [file c5ra11308c1.pdf]

# **Two Luminescent Metal-Organic Frameworks with Multifunctional Properties for Nitroaromatic Compounds Sensing and Photocatalysis**

Fengqin Wang<sup>1\*</sup>, Chengmiao Wang<sup>1</sup>, Zongchao Yu<sup>1</sup>, Qingguo He<sup>2</sup>, Xiuyu Li<sup>1</sup>, Chonglong Shang<sup>1</sup>, Yongnan Zhao<sup>3</sup>

<sup>1</sup>*College of Environment and Chemical Engineering & Key Lab of Hollow Fiber Membrane Materials & Membrane Process, Tianjin Polytechnic University, Tianjin 300387, China*

<sup>2</sup>*State Key Lab of Transducer Technology, Shanghai Institute of Microsystem and Information Technology, Chinese Academy of Sciences, Changning Road 865, Shanghai 200050, China.*

<sup>3</sup>*College of Materials and Engineering & Key Lab of Hollow Fiber Membrane Materials & Membrane Process, Tianjin Polytechnic University, Tianjin 300387, China*

E-mail: [wangfengqin@tjpu.edu.cn](mailto:wangfengqin@tjpu.edu.cn) Tel: (+86)-22-83955457

## **Supplementary Materials**

**Table S1** Crystal data and structure refinement for **1** and **2**

| Compound                                             | <b>1</b>                                                         | <b>2</b>                                                                       |
|------------------------------------------------------|------------------------------------------------------------------|--------------------------------------------------------------------------------|
| Chemical formula                                     | C <sub>24</sub> H <sub>20</sub> N <sub>3</sub> O <sub>8</sub> Zn | C <sub>48</sub> H <sub>40</sub> Cd <sub>2</sub> N <sub>6</sub> O <sub>16</sub> |
| Formula weight                                       | 543.80                                                           | 1181.66                                                                        |
| Temperature [K]                                      | 113(2)                                                           | 113(2)                                                                         |
| Wavelength[Å]                                        | 0.71073                                                          | 0.71073                                                                        |
| Crystal system                                       | Monoclinic                                                       | Monoclinic                                                                     |
| Space group                                          | P2(1)/c                                                          | P2(1)/c                                                                        |
| a[Å]                                                 | 10.170(2)                                                        | 10.275(2)                                                                      |
| b[Å]                                                 | 16.233(3)                                                        | 16.704(3)                                                                      |
| c[Å]                                                 | 12.934(3)                                                        | 13.021(3)                                                                      |
| $\alpha$ [°]                                         | 90                                                               | 90                                                                             |
| $\beta$ [°]                                          | 100.72(3)                                                        | 102.80(3)                                                                      |
| $\gamma$ [°]                                         | 90                                                               | 90                                                                             |
| Volume [Å <sup>3</sup> ]                             | 2098.1(7)                                                        | 2179.2(8)                                                                      |
| Z, Calculated density [Mg/m <sup>3</sup> ]           | 4, 1.722                                                         | 2, 1.801                                                                       |
| Absorption coefficient[mm <sup>-1</sup> ]            | 1.233                                                            | 1.062                                                                          |
| Theta range for data collection (deg)                | 2.04 to 28.02                                                    | 2.01 to 27.95                                                                  |
|                                                      | -13<=h<=13, -17<=k<=21,                                          | -13<=h<=13, -21<=k<=21, -                                                      |
| Limiting indices                                     | -16<=l<=17                                                       | 17<=l<=16                                                                      |
| <i>F</i> (000)                                       | 1116                                                             | 1188                                                                           |
| Reflections collected/unique                         | 21070/5032[R(int) = 0.0448]                                      | 21709/5203 [R(int) = 0.0356]                                                   |
| Goodness-of-fit on <i>F</i> <sup>2</sup>             | 0.999                                                            | 1.085                                                                          |
| Final R indices [ <i>I</i> >2 $\sigma$ ( <i>I</i> )] | R <sub>1</sub> = 0.0373, wR <sub>2</sub> = 0.0946                | R <sub>1</sub> = 0.0313, wR <sub>2</sub> = 0.0638                              |
| R indices (all data)                                 | R <sub>1</sub> = 0.0463, wR <sub>2</sub> = 0.0993                | R <sub>1</sub> = 0.0381, wR <sub>2</sub> = 0.0667                              |
| Largest diff. peak and hole[e.Å <sup>-3</sup> ]      | 0.764 and -0.578                                                 | 0.785 and -0.882                                                               |

**Table S2** Selected bond lengths and angles for **1-2** (Å, °)

| <b>1</b>            |            |                     |            |
|---------------------|------------|---------------------|------------|
| Zn(1)-O(1)          | 2.0408(15) | Zn(1)-N(3)          | 2.1097(17) |
| Zn(1)-O(6)          | 2.1148(15) | Zn(1)-N(2)          | 2.1597(17) |
| Zn(1)-O(4)#1        | 2.1831(16) | Zn(1)-O(3)#1        | 2.3191(16) |
| O(1)-Zn(1)-N(3)     | 117.04(6)  | O(1)-Zn(1)-O(6)     | 93.39(6)   |
| N(3)-Zn(1)-O(6)     | 92.84(7)   | N(3)-Zn(1)-N(2)     | 77.92(7)   |
| O(6)-Zn(1)-N(2)     | 168.09(6)  | O(4)#1-Zn(1)-O(3)#1 | 58.13(6)   |
| O(1)-Zn(1)-O(4)#1   | 92.59(6)   | N(3)-Zn(1)-O(4)#1   | 147.52(6)  |
| O(6)-Zn(1)-O(4)#1   | 98.67(6)   | N(2)-Zn(1)-O(4)#1   | 85.68(6)   |
| O(1)-Zn(1)-O(3)#1   | 148.99(6)  | N(3)-Zn(1)-O(3)#1   | 93.90(6)   |
| O(6)-Zn(1)-O(3)#1   | 82.34(6)   | N(2)-Zn(1)-O(3)#1   | 90.71(6)   |
| O(4)#1-Zn(1)-O(3)#1 | 58.13(6)   | O(1)-Zn(1)-C(8)#1   | 121.75(7)  |
| <b>2</b>            |            |                     |            |

|                   |            |                   |            |
|-------------------|------------|-------------------|------------|
| Cd(1)-O(4)#1      | 2.240(4)   | Cd(1)-O(7)        | 2.289(4)   |
| Cd(1)-N(3)        | 2.298(5)   | Cd(1)-N(2)        | 2.335(4)   |
| Cd(1)-O(1)        | 2.391(4)   | Cd(1)-O(2)        | 2.441(4)   |
| O(4)#1-Cd(1)-O(7) | 98.66(14)  | O(4)#1-Cd(1)-N(3) | 123.85(16) |
| O(7)-Cd(1)-N(3)   | 91.28(15)  | O(4)#1-Cd(1)-N(2) | 97.25(15)  |
| O(7)-Cd(1)-N(2)   | 161.70(14) | N(3)-Cd(1)-N(2)   | 72.29(16)  |
| O(4)#1-Cd(1)-O(1) | 85.77(14)  | O(7)-Cd(1)-O(1)   | 106.79(14) |
| N(3)-Cd(1)-O(1)   | 143.02(14) | N(2)-Cd(1)-O(1)   | 83.32(15)  |
| O(4)#1-Cd(1)-O(2) | 137.04(14) | O(7)-Cd(1)-O(2)   | 80.74(14)  |
| N(3)-Cd(1)-O(2)   | 99.06(15)  | N(2)-Cd(1)-O(2)   | 93.68(15)  |
| O(1)-Cd(1)-O(2)   | 54.41(13)  | O(4)#1-Cd(1)-C(1) | 112.40(15) |

Symmetry transformations used to generate equivalent atoms:

For 1: #1  $x+1, y, z$  #2  $x-1, y, z$  #3  $-x+1, -y+1, -z+1$

For 2: #1  $x-1, y, z$  #2  $x+1, y, z$  #3  $-x+1, -y+1, -z+1$

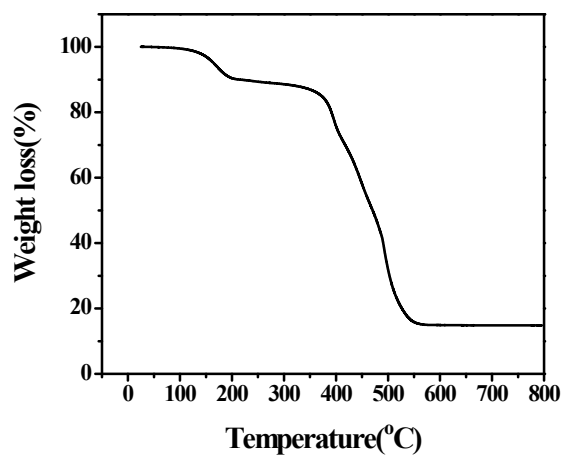

Fig. S1 TG curve of 1.

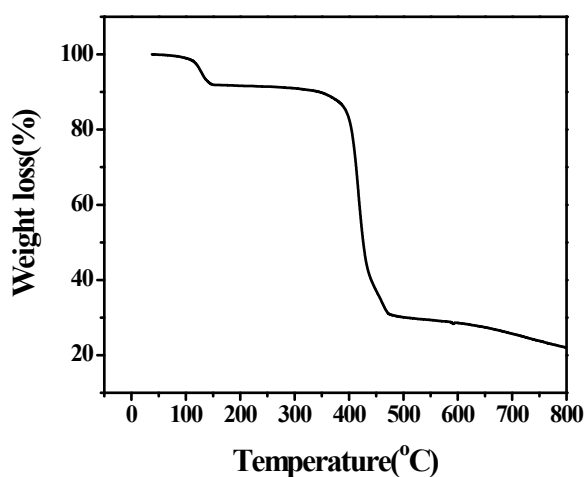

Fig. S2 TG curve of 2.

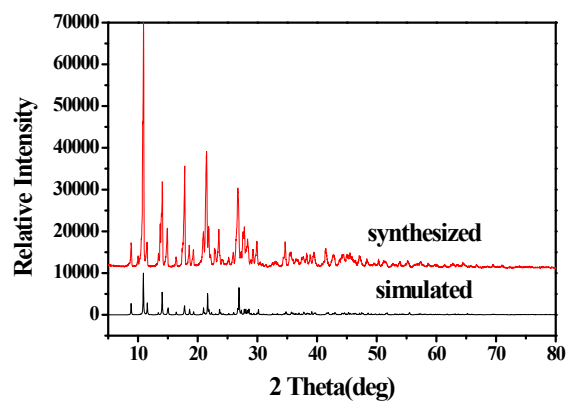

Fig. S3 PXRD pattern of 1

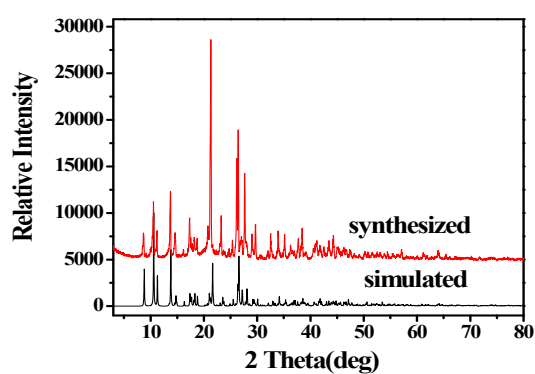

Fig. S4 PXRD pattern of 2

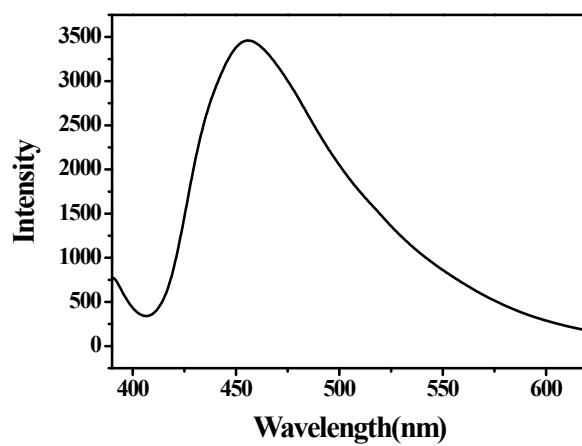

Fig. S5 The fluorescence spectra of 1 ( $\lambda_{\text{ex}} = 330 \text{ nm}$ ) at the solid state at room temperature

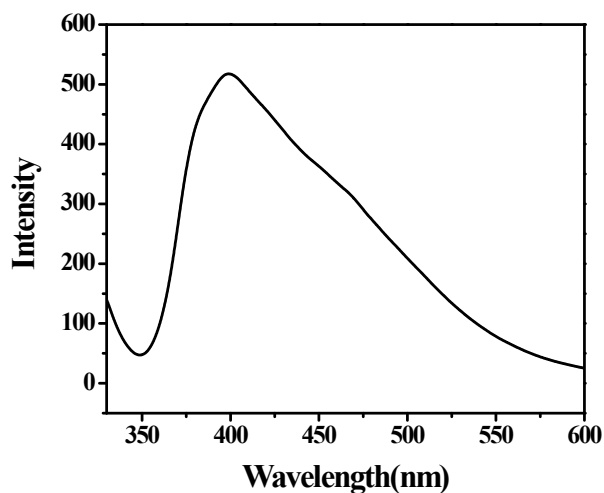

Fig. S6 The fluorescence spectra of **2** ( $\lambda_{\text{ex}} = 318 \text{ nm}$ ) at the solid state at room temperature

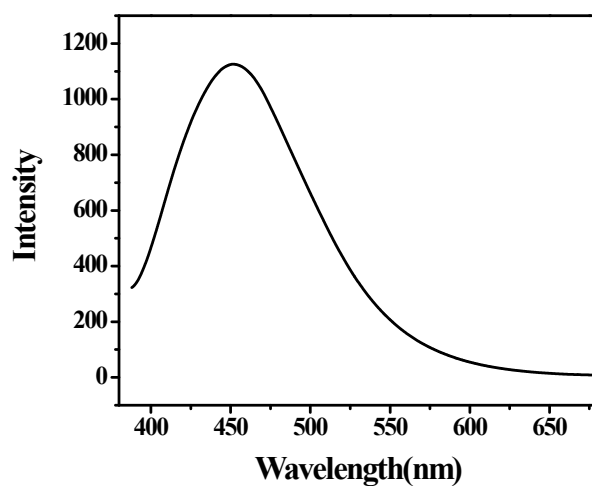

Fig. S7 The fluorescence spectra of **L** ligand ( $\lambda_{\text{ex}} = 357 \text{ nm}$ ) at the solid state at room temperature

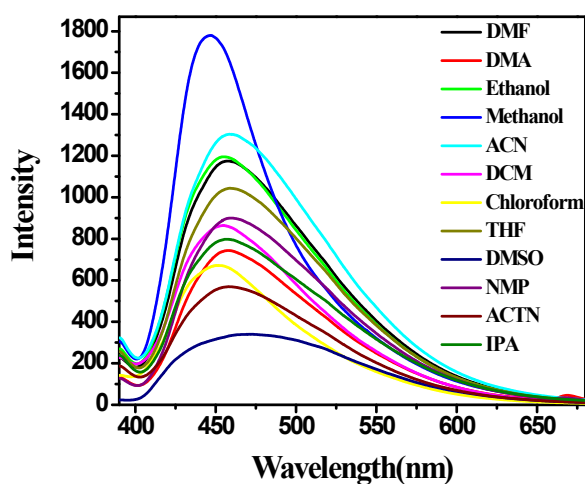

Fig. S8 Fluorescence emission spectra of **1** in different organic solvent at room temperature.

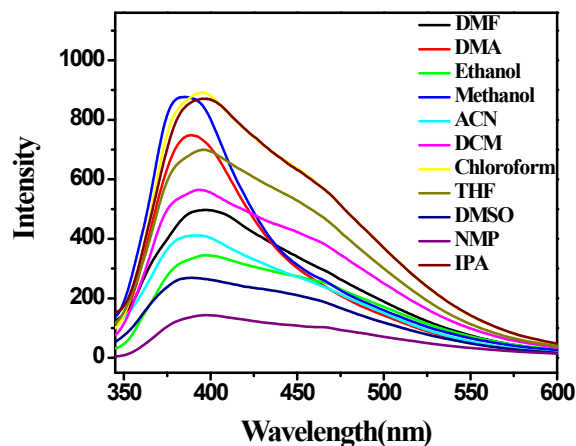

**Fig. S9** Fluorescence emission spectra of **2** in different organic solvent at room temperature

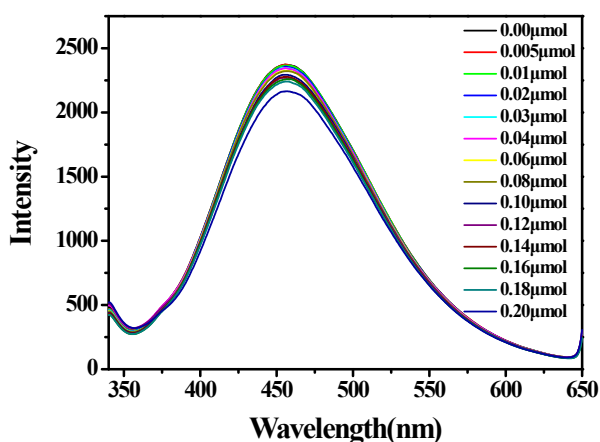

**Fig. S10** Fluorescence titration of **1** dispersed in DMA with the addition of different volume of  $10^{-3}$  M DMA solution of *p*-nitrotoluene. The excitation wavelength was 330 nm and fluorescence emission was monitored from 340 to 650 nm. The slit width for both excitation and emission were 5 nm.

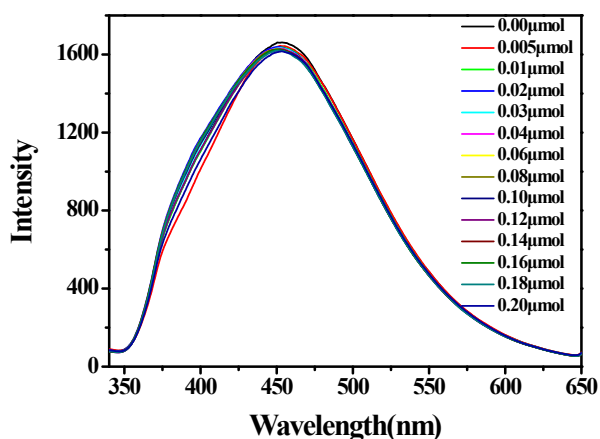

**Fig. S11** Fluorescence titration of **1** dispersed in DMA with the addition of different volume of  $10^{-3}$  M DMA solution of nitrobenzene. The excitation wavelength was 330 nm and fluorescence emission was monitored from 340 to 650 nm. The slit width for both excitation and emission were 5 nm.

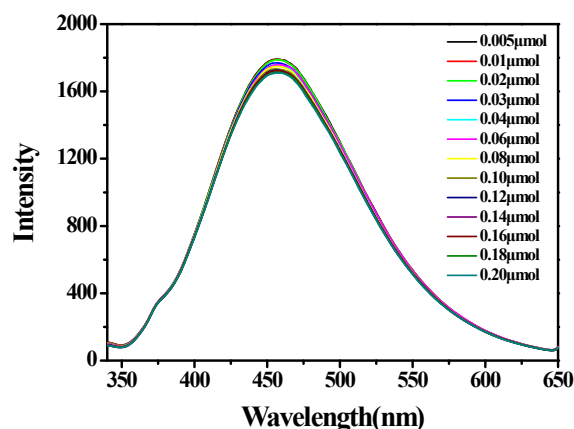

**Fig. S12** Fluorescence titration of **1** dispersed in DMA with the addition of different volume of  $10^{-3}$  M DMA solution of *m*-nitrotoluene. The excitation wavelength was 330 nm and fluorescence emission was monitored from 340 to 650 nm. The slit width for both excitation and emission were 5 nm.

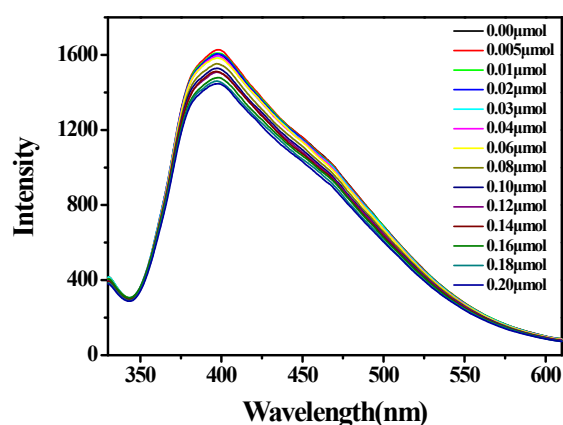

**Fig. S13** Fluorescence titration of **2** dispersed in isopropanol with the addition of different volume of  $10^{-3}$  M isopropanol solution of *p*-nitrotoluene. The excitation wavelength was 318 nm and fluorescence emission was monitored from 330 to 600 nm. The slit width for both excitation and emission were 5 nm.

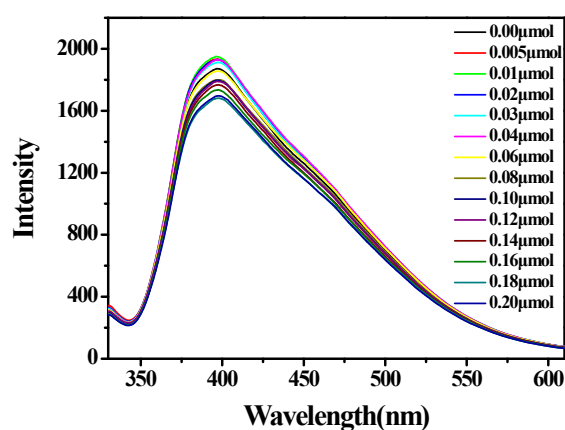

**Fig. S14** Fluorescence titration of **2** dispersed in isopropanol with the addition of different volume of  $10^{-3}$  M isopropanol solution of nitrobenzene. The excitation wavelength was 318 nm and fluorescence emission was monitored from 330 to 600 nm. The slit width for both excitation and

emission were 5 nm.

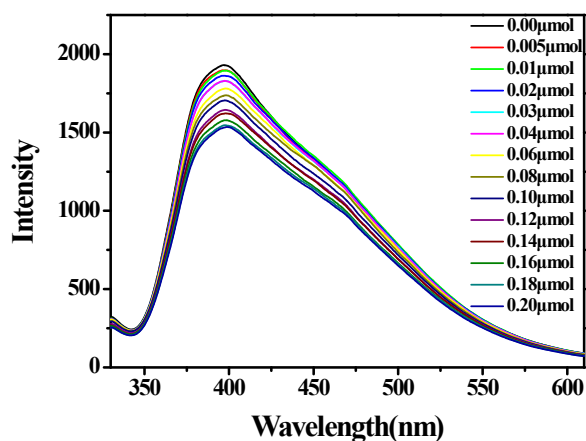

**Fig. S15** Fluorescence titration of **2** dispersed in isopropanol with the addition of different volume of  $10^{-3}$  M isopropanol solution of *m*-nitrotoluene. The excitation wavelength was 318 nm and fluorescence emission was monitored from 330 to 600 nm. The slit width for both excitation and emission were 5 nm.

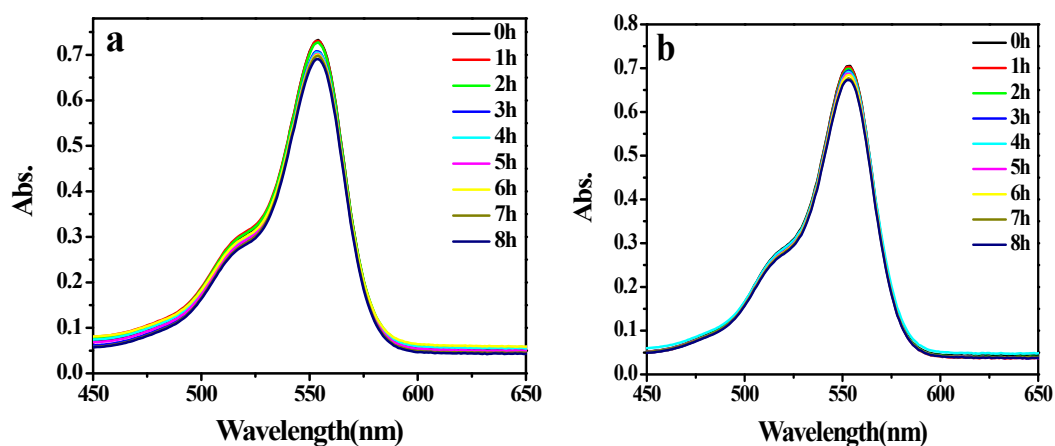

**Fig. S16** Absorption spectra of RhB degraded by **1** (a) and **2** (b) under dark conditions.

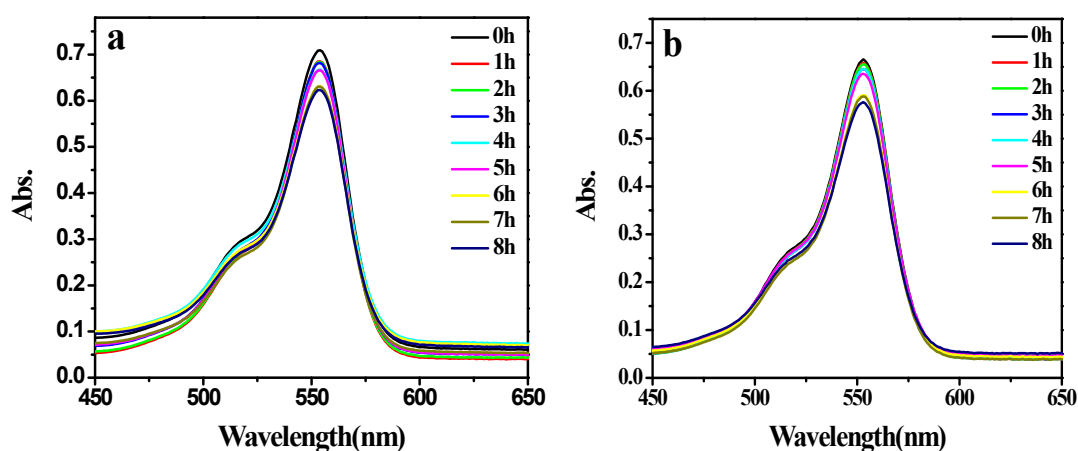

**Fig. S17** Absorption spectra of RhB degraded by **1** (a) and **2** (b) under natural illumination.



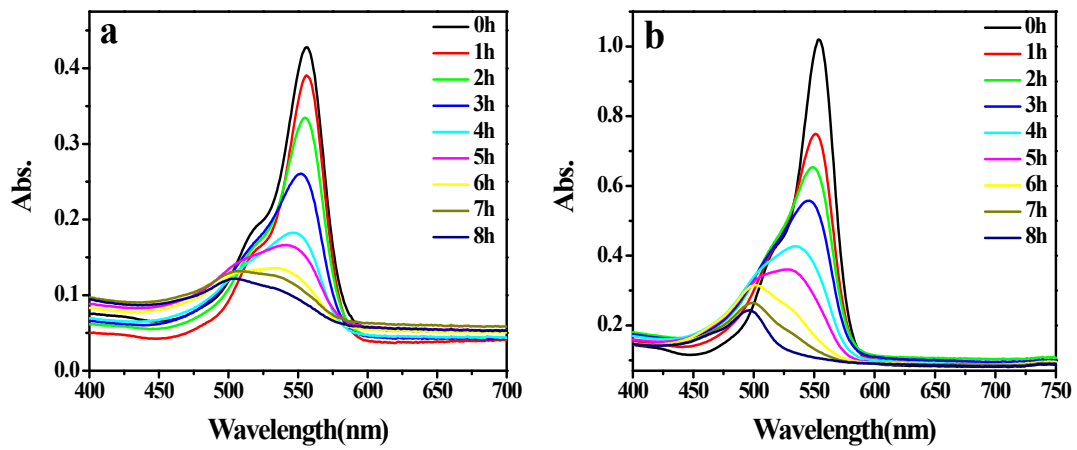

Fig. S18 Absorption spectra of RhB degraded by 1 (a) and 2 (b) under UV light.

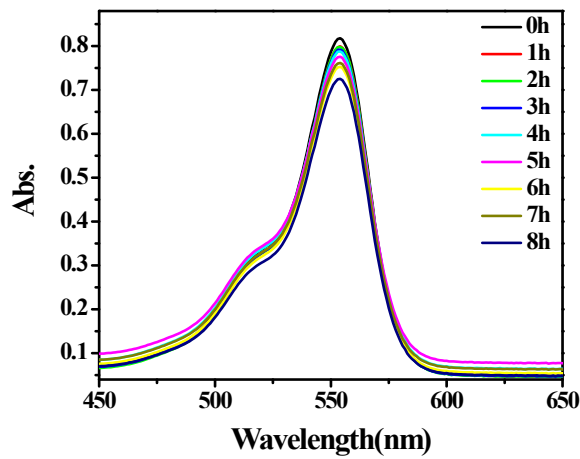

Fig. S19 Absorption spectra of RhB degraded without any catalyst under UV light.

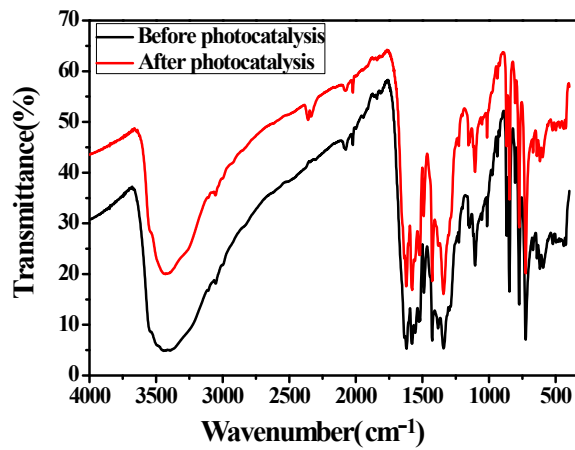

Fig. S20 The IR spectra of 1 before and after photocatalysis

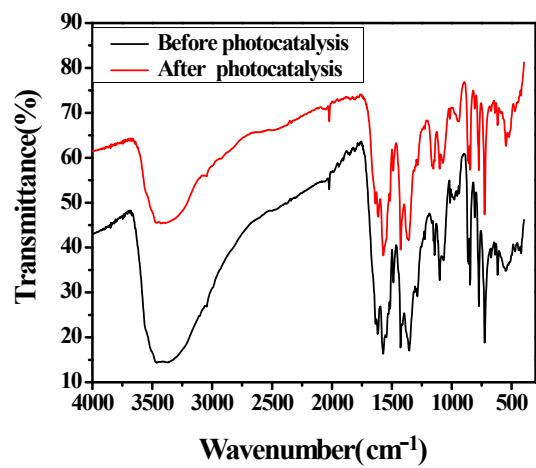

Fig. S21 The IR spectra of 2 before and after photocatalysis
